# Supplementary material for: Sensing performance and mechanism of shape-tunable CuO nanocrystals for monohydric alcohol gases
Source: Royal Society of Chemistry journal article supplement (doi:10.1039/d5nj02986d), 2025-01-01
Supplement: d5nj02986d1.pdf [file d5nj02986d1.pdf]

# Supporting information

## Sensing Performance and Mechanism of Shape-Tunable

### CuO Nanocrystals for Monohydric Alcohol Gases

Na Wang\*, Xiaofei Ren, Hongyu Sun, Jinghua Zhao, Yang Lu\*

*College of Mathematics and Computer Science, Jilin normal University, 1301*

*Haifeng Street, Siping 136000, China.*

*\*Corresponding author: Na Wang, [nawang@jlnu.edu.cn](mailto:nawang@jlnu.edu.cn). Lu Yang,*

*[luyang33@126.com](mailto:luyang33@126.com).*

*Tel.: +86-434-3291179; fax: +86-434-3291179.*

Table S1. The detailed list of experimental conditions

| Sample                                   | CuCl <sub>2</sub> ·2H <sub>2</sub> O | PVP/g | T/°C |
|------------------------------------------|--------------------------------------|-------|------|
| Cu <sub>2</sub> O-cube                   | 0.01 mol, 100 mL                     | 0     | 55   |
| Cu <sub>2</sub> O-Truncated Cube         | 0.01 mol, 100 mL                     | 0.833 | 55   |
| Cu <sub>2</sub> O-cubooctahedron         | 0.01 mol, 100 mL                     | 1.667 | 55   |
| Cu <sub>2</sub> O-Truncated octahedral-1 | 0.01 mol, 100 mL                     | 2.778 | 55   |
| Cu <sub>2</sub> O-Truncated octahedral-2 | 0.01 mol, 100 mL                     | 3.333 | 55   |
| Cu <sub>2</sub> O-octahedral             | 0.01 mol, 100 mL                     | 3.988 | 55   |

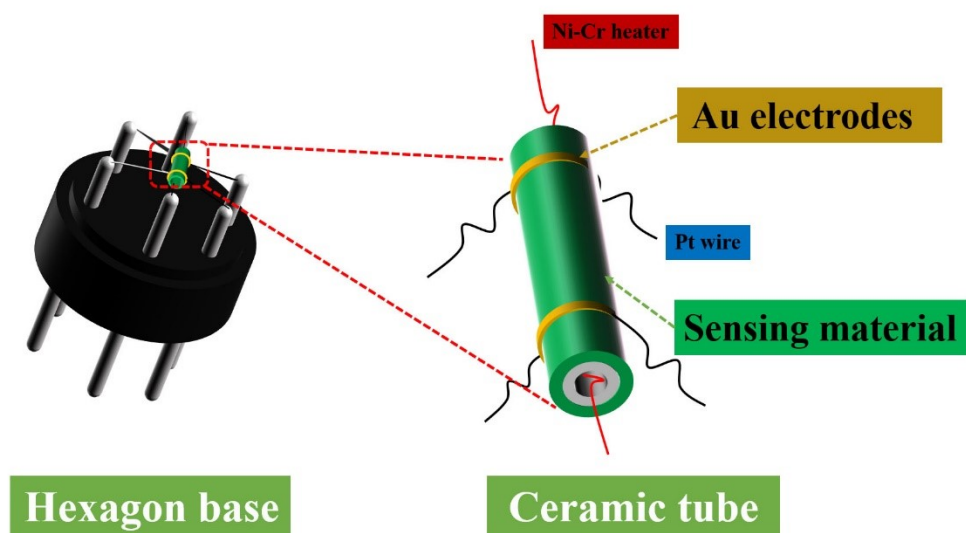

Fig. S1 The schematic diagram of the gas sensor device.

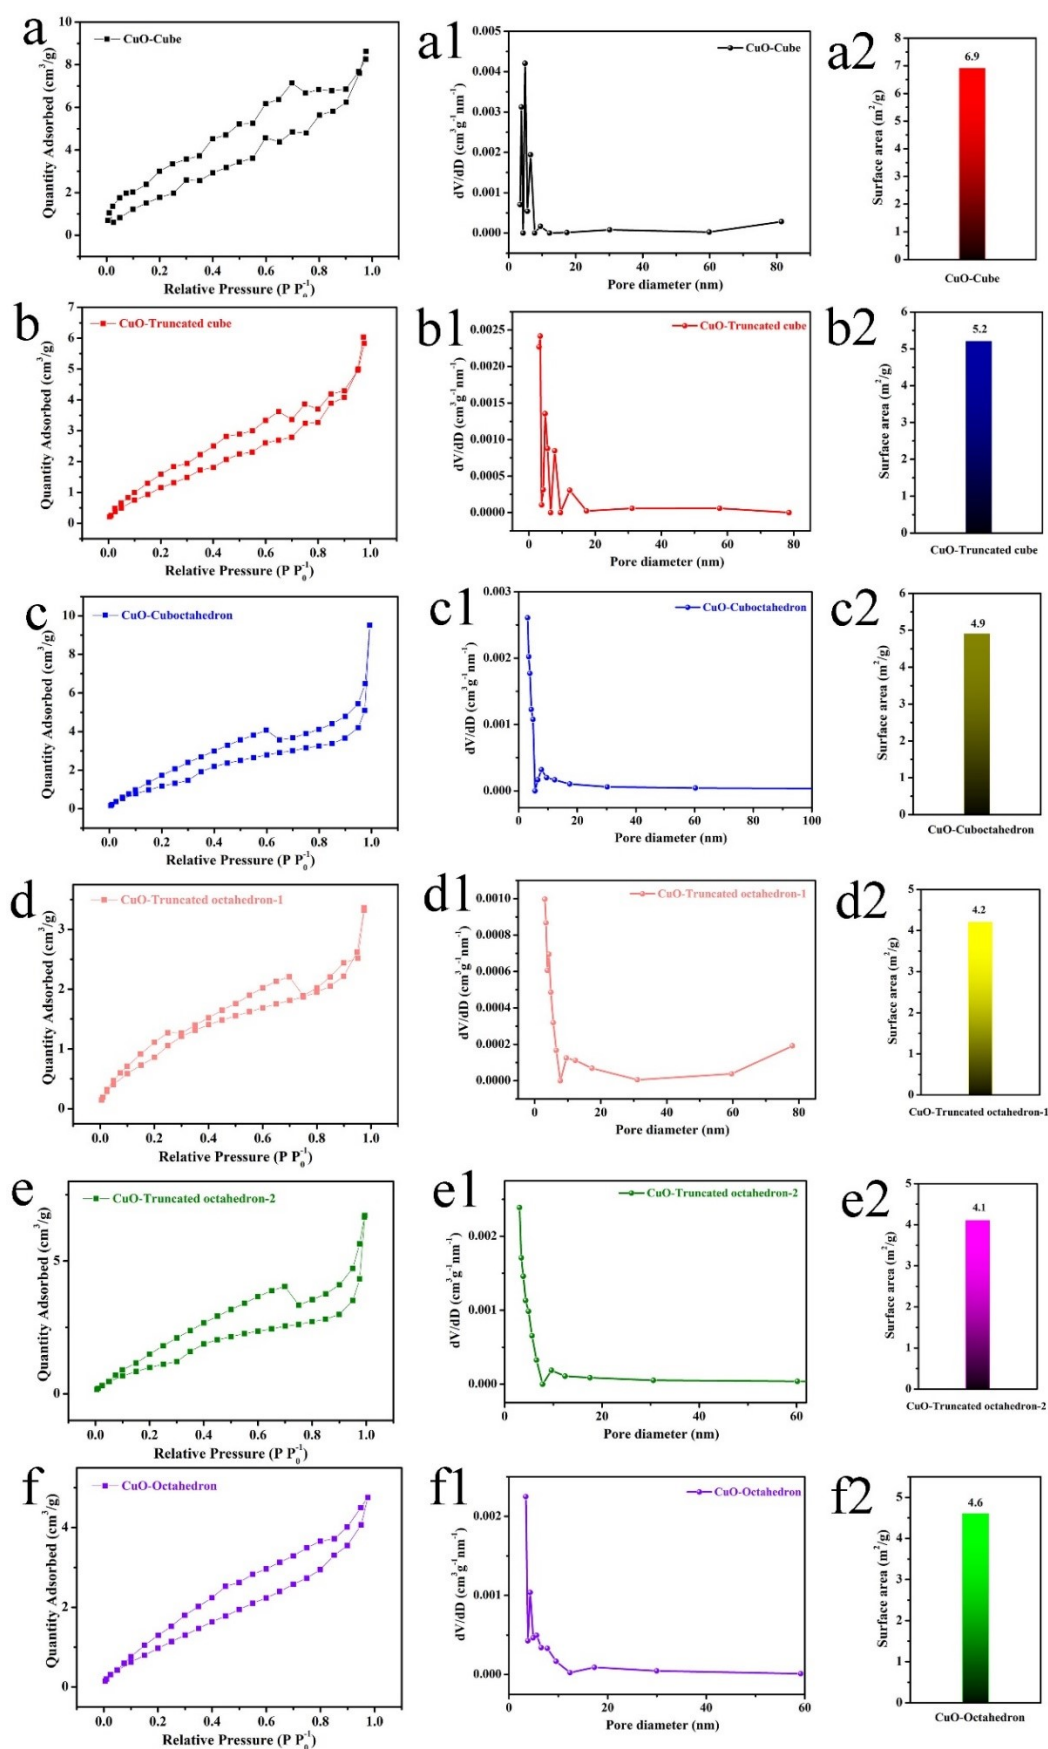

Fig. S2  $N_2$  adsorption-desorption isotherms, BET surface area and pore size distribution curve value of the six CuO sensors (a-a2: CuO-cube; b-b2: CuO-truncated

cube; c-c2: CuO-cuboctahedron; d-d2: CuO-truncated octahedron-1; e-e2: CuO-truncated octahedron-2; f-f2: CuO-octahedron).

## The detail about the DFT analyses:

The  $C_nH_{2n+2}O$  adsorbed on CuO were modeled using repeated slab geometry with four-layer CuO (110) surface. The VASP was used to perform DFT calculations within the local atomic orbital (LCAO) approach. For the exchange-correlation function, generalized gradient approximation (GGA) proposed by Perdew-Burke-Ernzerhof (PBE) was used. Soft pseudopotentials were used for Cu, O, C and H to describe the interaction between valence electrons and ionic cores. In the models, vacuum spacing of 30 Å in c direction was used between the structures to avoid strong bond interaction between them. The cut-off energy was set to 400 eV for all the calculations. The K-grid was set to  $5 \times 5 \times 1$  to reduce the system energy and forces up to 10<sup>-5</sup>eV and 0.02eV/Å, respectively. The lowest two layers of CuO were fixed during the optimization, to represent the authentic surface.

### (1) Molecular dissociation:

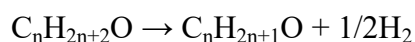

$$E_{\text{dissociation}} = E_{1/2H_2} + E_{C_nH_{2n+1}O} - E_{C_nH_{2n+2}O}$$

### (2) Surface adsorption:

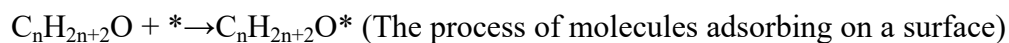

$$E_{\text{adsorption}} = E_{C_nH_{2n+2}O*} - E_* - E_{C_nH_{2n+2}O}$$

### (3) Surface dissociation adsorption:

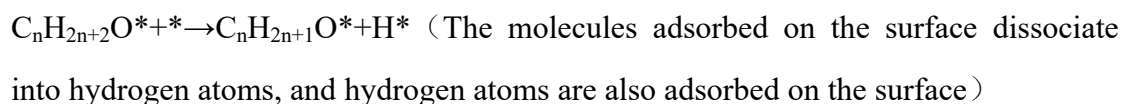

$$E_{\text{adis}} = E_{H*} + E_{C_nH_{2n+1}O*} - E_* - E_{C_nH_{2n+2}O*}$$

We calculated the above three processes of six different alcohol molecules from C1 to C6 on three different copper oxide crystal planes, and calculated the energy (internal energy) changes of the three processes. Thermodynamically speaking, the process of

energy reduction, that is, the negative energy change, spontaneously occurs in an isolated system. The more energy reduction, the more favorable the progress of one process. Therefore, by comparing the energy changes, the strength of the interaction between different CuO crystal planes and different alcohol molecules can be inferred. Comparing with experimental data can explain why the detection signal for a certain alcohol molecule is stronger.
